# Supplementary material
Source: PubMed Central journal article supplement (PMC5477792)
Supplement: NIHMS857601-supplement-supplement_1.pdf [file NIHMS857601-supplement-supplement_1.pdf]

**Supplementary Table 1****Multivariable Model that included all factors that had  $p < 0.25$  in the univariate analyses (N= 973)**

| Variable                                                                   | Odds ratio | 95% CI      | <i>p</i> value |
|----------------------------------------------------------------------------|------------|-------------|----------------|
| Age                                                                        | 1.27       | 1.04 - 1.54 | < 0.05         |
| Sex                                                                        | 1.94       | 1.42 - 2.64 | < 0.001        |
| Birthplace                                                                 | 1.20       | 0.81 - 1.76 | < 0.4          |
| Subjective Social Status                                                   | 0.90       | 0.82 - 0.99 | < 0.05         |
| Language Acculturation                                                     | 1.06       | 0.87 - 1.29 | < 0.6          |
| Parental Education                                                         | 1.05       | 0.86 - 1.28 | < 0.7          |
| Anxiety Score                                                              | 1.03       | 1.01 - 1.04 | < 0.01         |
| Behavioral Intentions:<br>Do you think that you will try a cigarette soon? | 1.53       | 1.03 - 2.28 | < 0.05         |
| Peer Influence:<br>How many of your friends smoke?                         | 1.53       | 0.97 - 2.43 | < 0.07         |
| Peer Influence:<br>How many of your parents' friends smoke                 | 1.35       | 0.97 - 1.88 | < 0.08         |
| Family Influence:<br>How many individuals in your household smoke?         | 1.14       | 0.90 - 1.45 | < 0.3          |
| Family Cohesion                                                            | 0.93       | 0.64 - 1.36 | < 0.8          |
| Family Conflict                                                            | 0.93       | 0.68 - 1.28 | < 0.7          |
| Positive Outcome Expectations                                              | 1.33       | 0.88 - 2.02 | < 0.2          |

CI = Confidence Interval

**Supplementary Table 2****Final Multivariable Model with the addition of Parental Education (N= 973)**

| Variable                                                                | Odds ratio | 95% CI      | <i>p</i> value |
|-------------------------------------------------------------------------|------------|-------------|----------------|
| Age                                                                     | 1.27       | 1.04 - 1.54 | < 0.05         |
| Sex                                                                     | 1.89       | 1.39 - 2.57 | < 0.001        |
| Subjective Social Status                                                | 0.90       | 0.82 - 0.98 | < 0.05         |
| Parental Education                                                      | 1.09       | 0.89 - 1.32 | < 0.5          |
| Anxiety Score                                                           | 1.03       | 1.02 - 1.05 | < 0.001        |
| Behavioral Intentions: Do you think that you will try a cigarette soon? | 1.73       | 1.19 - 2.51 | < 0.01         |
| How many of your friends smoke?                                         | 1.65       | 1.05 - 2.59 | < 0.05         |
| How many of your parents' friends smoke                                 | 1.43       | 1.04 - 1.96 | < 0.05         |

CI = Confidence Interval
